# Supplementary material for: Allosteric modulation of cardiac myosin dynamics by omecamtiv mecarbil
Source: PubMed Central journal article supplement (PMC5690683; doi:10.1371/journal.pcbi.1005826), 2017-11-06
Supplement: pcbi.1005826.s004.pdf [file pcbi.1005826.s004.pdf]

**S4 Table.** Frequency of OM-residue hydrogen bonds during OM-bound MD simulations

| <b>Residue</b> | <b>OMA1<sup>a</sup></b> | <b>OMA2<sup>a</sup></b> | <b>OMB1<sup>a</sup></b> | <b>OMB2<sup>a</sup></b> |
|----------------|-------------------------|-------------------------|-------------------------|-------------------------|
| R712           | 0.18                    | 0.47                    | 0.61                    | 0.31                    |
| C705           | 0.04                    | 0.50                    | 0.02                    | 0.47                    |
| A91            | 0.11                    | 0.22                    | 0.25                    | 0.15                    |
| N711           | 0.09                    | 0.22                    | 0.22                    | 0.00                    |
| S118           | 0.06                    | 0.12                    | 0.00                    | 0.10                    |
| K762           | 0.21                    | 0.00                    | 0.01                    | 0.01                    |
| L120           | 0.19                    | 0.00                    | 0.00                    | 0.00                    |

<sup>a</sup>Hydrogen bonds are calculated using a threshold of 3.5 Å on the D(onor)-A(ceptor) distance and 30° on the D-H-A angle.
