# Supplementary material for: Allosteric modulation of cardiac myosin dynamics by omecamtiv mecarbil
Source: PubMed Central journal article supplement (PMC5690683; doi:10.1371/journal.pcbi.1005826), 2017-11-06
Supplement: pcbi.1005826.s006.pdf [file pcbi.1005826.s006.pdf]

**S6 Table.** Node degeneracy in the OM-Apo contact change network

| <b>Resid<sup>a</sup></b> | <b>Degeneracy<sup>b</sup></b> |
|--------------------------|-------------------------------|
| 121                      | 0.40                          |
| 174                      | 0.20                          |
| 175                      | 0.17                          |
| 176                      | 0.20                          |
| 177                      | 0.52                          |
| 178                      | 0.31                          |
| 184                      | 0.23                          |
| 191                      | 0.20                          |
| 195                      | 0.20                          |
| 217                      | 0.15                          |
| 220                      | 0.11                          |
| 223                      | 0.57                          |
| 226                      | 0.23                          |
| 227                      | 0.65                          |
| 246                      | 0.72                          |
| 258                      | 0.15                          |
| 266                      | 0.72                          |
| 338                      | 0.15                          |
| 459                      | 0.20                          |
| 462                      | 0.72                          |
| 671                      | 0.17                          |
| 693                      | 0.43                          |
| 696                      | 0.83                          |
| 698                      | 1.00                          |

<sup>a</sup>Residues involved in the shortest paths connecting V698 and G helix residues in the network of OM-Apo contact changes (Fig. 10).

<sup>b</sup>Fraction of the number of paths going through each residue.
