# Supplementary material for: Allosteric modulation of cardiac myosin dynamics by omecamtiv mecarbil
Source: PubMed Central journal article supplement (PMC5690683; doi:10.1371/journal.pcbi.1005826), 2017-11-06
Supplement: pcbi.1005826.s007.pdf [file pcbi.1005826.s007.pdf]

**S7 Table.** OM-Apo contact frequency difference

| $i^a$ | $j^a$ | $\Delta f^b$ |
|-------|-------|--------------|
| 195   | 199   | 0.95         |
| 178   | 696   | -0.68        |
| 199   | 258   | 0.58         |
| 177   | 696   | -0.56        |
| 195   | 258   | -0.52        |
| 199   | 252   | 0.45         |
| 464   | 475   | -0.40        |
| 217   | 258   | 0.36         |
| 466   | 475   | -0.35        |
| 195   | 252   | -0.34        |
| 174   | 195   | 0.28         |
| 222   | 226   | -0.27        |
| 191   | 459   | -0.24        |
| 180   | 466   | -0.24        |
| 223   | 227   | -0.22        |
| 176   | 459   | 0.21         |
| 177   | 462   | 0.21         |
| 224   | 246   | -0.21        |
| 177   | 464   | 0.21         |
| 175   | 671   | 0.21         |
| 693   | 696   | 0.20         |
| 216   | 261   | 0.20         |
| 185   | 242   | -0.20        |
| 223   | 338   | 0.19         |
| 176   | 184   | -0.17        |
| 195   | 250   | -0.17        |
| 220   | 223   | -0.17        |
| 174   | 191   | -0.16        |
| 217   | 221   | -0.16        |
| 246   | 266   | 0.15         |
| 218   | 338   | -0.15        |
| 228   | 242   | 0.15         |
| 266   | 462   | -0.15        |
| 178   | 462   | 0.15         |
| 178   | 464   | 0.15         |
| 121   | 698   | 0.15         |
| 216   | 259   | -0.14        |
| 180   | 242   | -0.14        |
| 121   | 696   | 0.14         |
| 339   | 439   | 0.14         |
| 223   | 226   | 0.14         |
| 230   | 439   | -0.13        |
| 219   | 338   | -0.12        |
| 226   | 339   | -0.12        |
| 250   | 261   | -0.12        |
| 185   | 461   | -0.12        |
| 693   | 698   | -0.12        |
| 184   | 461   | 0.11         |
| 175   | 462   | -0.11        |
| 671   | 698   | -0.11        |
| 252   | 259   | 0.11         |
| 177   | 184   | -0.11        |
| 227   | 246   | -0.11        |
| 220   | 258   | -0.10        |

<sup>a</sup>Residues involved in the shortest paths connecting V698 and G helix residues in the network of OM-Apo contact changes (Fig. 10).

<sup>b</sup>Difference between the consensus matrices of contact frequencies calculated from the OM-bound and Apo simulations.
