# Supplementary material for: Allosteric modulation of cardiac myosin dynamics by omecamtiv mecarbil
Source: PubMed Central journal article supplement (PMC5690683; doi:10.1371/journal.pcbi.1005826), 2017-11-06
Supplement: pcbi.1005826.s021.pdf [file pcbi.1005826.s021.pdf]

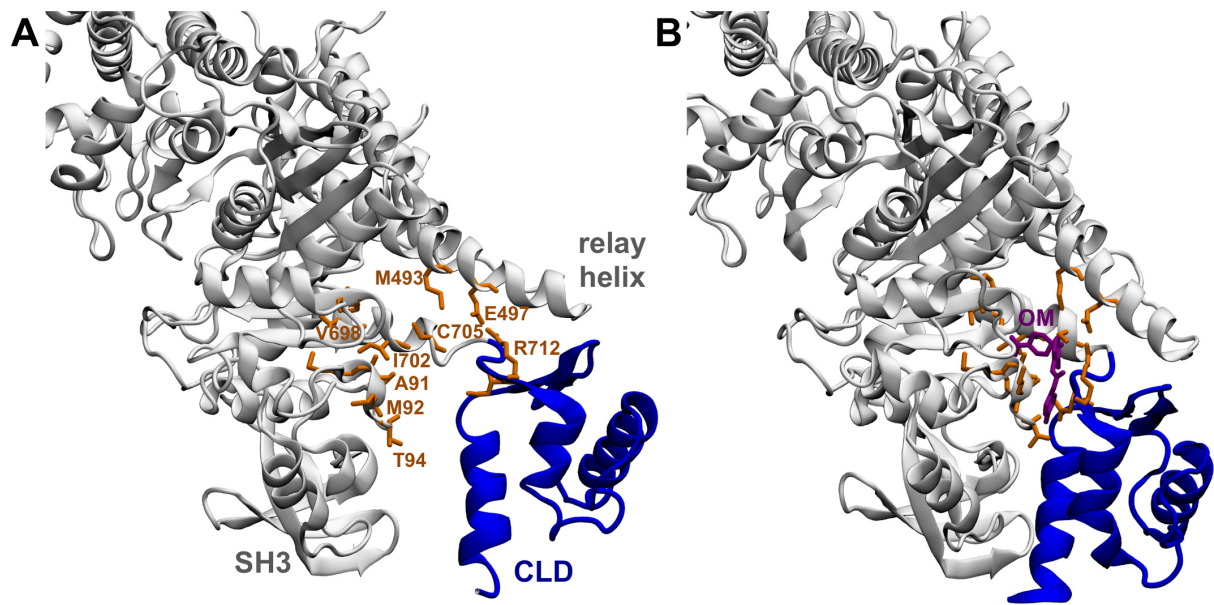

**S11 Fig. Comparison of representative structures from Apo and OM-bound trajectories.** Cartoon representation of structures sampled at the end of ApoA1 (A) and OMA2 (B) simulations (280 ns). The CLD (blue cartoon) and key residues in the OM-binding region (orange sticks) are highlighted.
